# Supplementary material for: Determination of Trace Elements in Corydalis conspersa and Corydalis linarioides by ICP-AES
Source: Hindawi journal article supplement (doi:10.1155/2020/6567015), 2020-10-24
Supplement: f1 [file 6567015.f1.docx]

# SUPPLEMENTARY DATA

**S1: Results for the limit of detection and quantitation**

To calculate by dividing the 3, 10 times standard deviation of the measured value from the blank control solution by the slope of the corresponding element standard curve to acquire the limit of detection and quantitation

| **limit** | **limit of detection and quantitation (3 times)** | | | | | | | | | | | | | | | | |
| --- | --- | --- | --- | --- | --- | --- | --- | --- | --- | --- | --- | --- | --- | --- | --- | --- | --- |
| **elements** | **Al** | **As** | **B** | **Ca** | **Cr** | **Cu** | **Fe** | **K** | **Li** | **Mg** | **Mn** | **Na** | **Ni** | **P** | **Si** | **Ti** | **Zn** |
| **Control value** | 0.0814 | 1.256 | 107.67 | 0.1691 | 0.0221 | 0.0039 | 0.0335 | 0.0028 | 0.0433 | 0.0920 | 0.0022 | 0.1305 | 0.1290 | 0.0273 | 2.6613 | 0.0015 | 0.0921 |
| **Detection**  **(µg/g)** | 0.0005 | 0.0480 | 0.0013 | 0.0086 | 0.0002 | 0.0041 | 0.0022 | 0.0036 | 0.0042 | 0.0001 | 0.0011 | 0.0006 | 0.0003 | 0.1024 | 0.0237 | 0.0018 | 0.0056 |
| **Quantitation**  **(µg/g)** | 0.0015 | 0.1454 | 0.0039 | 0.0261 | 0.0006 | 0.0124 | 0.0067 | 0.0109 | 0.0127 | 0.0003 | 0.0033 | 0.0018 | 0.0009 | 0.3103 | 0.0718 | 0.0054 | 0.0170 |
| **RSD(%)** | 2.61 | 2.14 | 0.79 | 4.47 | 0.78 | 2.18 | 0.80 | 2.31 | 1.63 | 5.46 | 1.93 | 1.23 | 0.50 | 0.73 | 2.28 | 1.92 | 1.57 |

**S2: Results for Precision experiment**

6 repetitions injections for the same samples to investigate the contents change on the precision of the method

| **Test times** | **Contents of elements** | | | | | | | | | | | | | | | | |
| --- | --- | --- | --- | --- | --- | --- | --- | --- | --- | --- | --- | --- | --- | --- | --- | --- | --- |
| Al | As | B | Ca | Cr | Cu | Fe | K | Li | Mg | Mn | Na | Ni | P | Si | **Ti** | Zn |
| **1** | 0.4127 | 0.0468 | 0.0085 | 6.817 | 0.0272 | 0.0077 | 0.4609 | 2.471 | 0.0453 | 1.120 | 0.0178 | 0.6578 | 0.0059 | 0.7561 | 0.3605 | 0.0115 | 0.2307 |
| **2** | 0.4020 | 0.0488 | 0.0085 | 6.682 | 0.0257 | 0.0079 | 0.4598 | 2.450 | 0.0452 | 1.102 | 0.0176 | 0.6619 | 0.0062 | 0.7484 | 0.3623 | 0.0107 | 0.2342 |
| **3** | 0.4147 | 0.0477 | 0.0083 | 6.628 | 0.0253 | 0.0077 | 0.4564 | 2.438 | 0.0452 | 1.079 | 0.0175 | 0.6651 | 0.0059 | 0.7444 | 0.3605 | 0.0114 | 0.2333 |
| **4** | 0.4019 | 0.0469 | 0.0080 | 6.825 | 0.0253 | 0.0079 | 0.4675 | 2.429 | 0.0453 | 1.115 | 0.0173 | 0.6578 | 0.0059 | 0.7591 | 0.3623 | 0.0110 | 0.2281 |
| **5** | 0.3960 | 0.0468 | 0.0081 | 6.709 | 0.0256 | 0.0077 | 0.4634 | 2.453 | 0.0454 | 1.111 | 0.0174 | 0.6619 | 0.0060 | 0.7520 | 0.3605 | 0.0114 | 0.2309 |
| 6 | 0.3844 | 0.0469 | 0.0081 | 6.628 | 0.0256 | 0.0075 | 0.4549 | 2.461 | 0.0420 | 1.093 | 0.0216 | 0.6651 | 0.0055 | 0.7300 | 0.3623 | 0.0112 | 0.2303 |
| **Average** | 0.4020 | 0.0473 | 0.0083 | 6.715 | 0.0258 | 0.0077 | 0.4605 | 2.129 | 0.0447 | 1.103 | 0.0175 | 0.6616 | 0.0059 | 0.7483 | 0.3614 | 0.0112 | 0.2313 |
| **RSD(%)** | 2.77 | 1.70 | 2.63 | 1.31 | 2.77 | 1.95 | 1.00 | 2.44 | 3.00 | 1.39 | 1.02 | 0.49 | 3.87 | 1.39 | 0.27 | 2.71 | 0.95 |
| **Contents**  **(mg/g)** | 1.86 | 0.22 | 0.04 | 31.09 | 0.12 | 0.04 | 2.13 | 11.34 | 0.21 | 5.11 | 0.08 | 3.06 | 0.03 | 3.46 | 1.67 | 0.05 | 1.07 |

**S3: Results for Stability experiment**

To detect the value of elements at the time 0, 3, 24h after the same sample preparation

| **Time(H)** | **Determination value of elements (3 times)** | | | | | | | | | | | | | | | | |
| --- | --- | --- | --- | --- | --- | --- | --- | --- | --- | --- | --- | --- | --- | --- | --- | --- | --- |
| **elements** | Al | As | B | Ca | Cr | Cu | Fe | K | Li | Mg | Mn | Na | Ni | P | Si | **Ti** | Zn |
| **0** | 0.3156 | 0.0208 | 0.0032 | 4.952 | 0.013 | 0.0207 | 0.426 | 2.546 | 0.0256 | 2.195 | 0.0205 | 0.8018 | 0.0284 | 2.771 | 0.7441 | 0.0077 | 0.1042 |
| **3** | 0.3241 | 0.0186 | 0.0032 | 5.041 | 0.012 | 0.0207 | 0.458 | 2.247 | 0.0244 | 2.053 | 0.0199 | 0.7941 | 0.0286 | 2.764 | 0.8082 | 0.008 | 0.1064 |
| **24** | 0.3219 | 0.0207 | 0.0031 | 5.689 | 0.013 | 0.0204 | 0.448 | 2.434 | 0.0246 | 2.094 | 0.0207 | 0.7994 | 0.0280 | 2.619 | 0.8082 | 0.0077 | 0.1051 |
| **Average** | 0.3205 | 0.0200 | 0.0032 | 5.181 | 0.013 | 0.0206 | 0.444 | 2.396 | 0.0249 | 2.114 | 0.0204 | 0.7984 | 0.0283 | 2.718 | 0.7868 | 0.0078 | 0.1052 |
| **RSD(%)** | 1.38 | 0.35 | 1.82 | 1.21 | 4.56 | 0.84 | 3.69 | 4.42 | 2.58 | 3.46 | 2.04 | 0.49 | 1.08 | 3.16 | 4.70 | 2.22 | 1.05 |

**S4: Results for Repeatability experiment**

3 repetitions detection for the 5 copies preparation samples to investigate the determination change on the repeatability of the method

| **Sample times** | **Determination values of elements (3 times)** | | | | | | | | | | | | | | | | |
| --- | --- | --- | --- | --- | --- | --- | --- | --- | --- | --- | --- | --- | --- | --- | --- | --- | --- |
| Al | As | B | Ca | Cr | Cu | Fe | K | Li | Mg | Mn | Na | Ni | P | Si | **Ti** | Zn |
| **1** | 0.3550 | 0.0463 | 0.0496 | 41.58 | 0.0348 | 0.0210 | 0.6617 | 10.91 | 0.0453 | 4.015 | 0.0808 | 0.8141 | 0.0282 | 2.337 | 0.0226 | 0.0150 | 0.1338 |
| **2** | 0.3581 | 0.0458 | 0.0491 | 41.54 | 0.0342 | 0.0205 | 0.6643 | 10.92 | 0.0433 | 3.974 | 0.0804 | 0.7928 | 0.0285 | 2.361 | 0.0227 | 0.0142 | 0.1351 |
| **3** | 0.3558 | 0.0463 | 0.0518 | 42.34 | 0.0334 | 0.0207 | 0.6687 | 10.83 | 0.0453 | 4.007 | 0.0826 | 0.7984 | 0.0284 | 2.345 | 0.0227 | 0.0148 | 0.1349 |
| **4** | 0.3500 | 0.0458 | 0.0505 | 40.53 | 0.0331 | 0.0188 | 0.6682 | 10.82 | 0.0433 | 3.959 | 0.0811 | 0.8141 | 0.0288 | 2.357 | 0.0227 | 0.0155 | 0.1250 |
| **5** | 0.3558 | 0.0463 | 0.0493 | 39.76 | 0.0327 | 0.0189 | 0.6631 | 10.03 | 0.0453 | 3.982 | 0.0799 | 0.7928 | 0.0292 | 2.323 | 0.0227 | 0.0146 | 0.1241 |
| **Average** | 0.3549 | 0.0461 | 0.0501 | 41.15 | 0.0336 | 0.0199 | 0.6652 | 10.70 | 0.0445 | 3.987 | 0.0810 | 0.8024 | 0.0279 | 2.345 | 0.0227 | 0.0148 | 0.1306 |
| **RSD(%)** | 0.84 | 0.59 | 2.22 | 2.45 | 2.53 | 0.93 | 0.47 | 3.54 | 2.46 | 0.58 | 1.26 | 1.36 | 1.36 | 0.65 | 0.20 | 2.07 | 0.74 |

**S5: Results for the Average Recovery**

To add the 1ppm, 10ppm mixed standard solution to the known contents samples and detect the average recovery

| **Average Recovery** | **Determination values of elements and recovery (3 times)** | | | | | | | | | | | | | | | | |
| --- | --- | --- | --- | --- | --- | --- | --- | --- | --- | --- | --- | --- | --- | --- | --- | --- | --- |
| **elements** | **Al** | **As** | **B** | **Ca** | **Cr** | **Cu** | **Fe** | **K** | **Li** | **Mg** | **Mn** | **Na** | **Ni** | **P** | **Si** | **Ti** | **Zn** |
| **Add 1ppm** | 124.77 | 129.45 | 122.43 | 103.47 | 117.45 | 125.28 | 112.13 | 106.09 | 113.55 | 115.10 | 118.36 | 122.81 | 125.20 | 112.93 | 118.1 | 110.47 | 109.32 |
| **Add 10ppm** | 114.90 | 121.65 | 121.11 | 105.28 | 111.88 | 115.38 | 108.49 | 103.56 | 112.77 | 118.99 | 112.78 | 100.96 | 118.47 | 114.65 | 113.38 | 106.89 | 109.96 |
| **Average** | 119.83 | 121.55 | 121.77 | 104.38 | 114.67 | 120.33 | 110.31 | 104.83 | 113.16 | 117.04 | 115.57 | 111.88 | 121.83 | 113.79 | 115.74 | 108.68 | 109.64 |
| **RSD(%)** | 2.62 | 3.03 | 1.95 | 3.12 | 2.83 | 2.84 | 2.39 | 2.46 | 2.96 | 2.15 | 1.84 | 3.89 | 2.23 | 2.51 | 2.88 | 2.41 | 1.89 |
